# Supplementary material for: Probing the acceptor substrate binding site of Trypanosoma cruzi trans-sialidase with systematically modified substrates and glycoside libraries
Source: PubMed Central journal article supplement — Org Biomol Chem. 2011 Jan 21;9(5):1653–60. doi: 10.1039/c0ob00826e (PMC3315775; doi:10.1039/c0ob00826e), 2011-01-21
Supplement: OB-009-c0ob00826e-s001.pdf [file OB-009-c0ob00826e-s001.pdf]

## Probing the acceptor substrate binding site of *Trypanosoma cruzi* trans-sialidase with systematically modified substrates and glycoside libraries

Jennifer A. Harrison,<sup>a</sup> K. P. Ravindranathan Kartha,<sup>b</sup> Eric J. L. Fournier,<sup>c</sup> Todd L. Lowary,<sup>c</sup> Carles Malet,<sup>c</sup> Ulf J. Nilsson,<sup>d</sup> Ole Hindsgaul,<sup>c,e</sup> Sergio Schenkman,<sup>f</sup> James H. Naismith<sup>a</sup> and Robert A. Field<sup>g,\*</sup>

### Electronic supplementary information

$\beta$ -Thiogalactoside library information – for experimental details see:

(a) U. J. Nilsson, E. J. L. Fournier and O. Hindsgaul, *Bioorg. Med. Chem.*, 1998, **6**, 1563-1575

(b) U. J. Nilsson, E. J. L. Fournier, E. J. Fryz and O. Hindsgaul, *Combi. Chem. High Throughput Screen.*, 1999, **2**, 335-352.

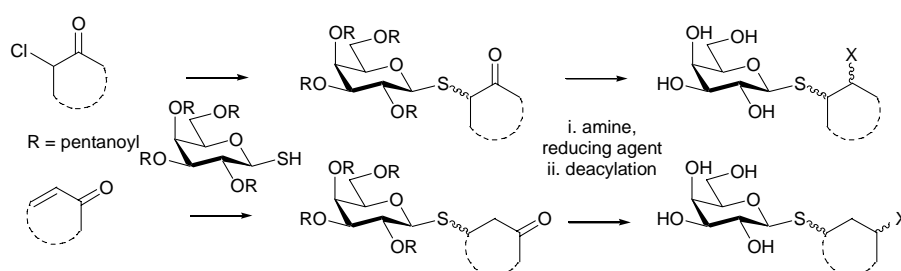

Ketone reactant

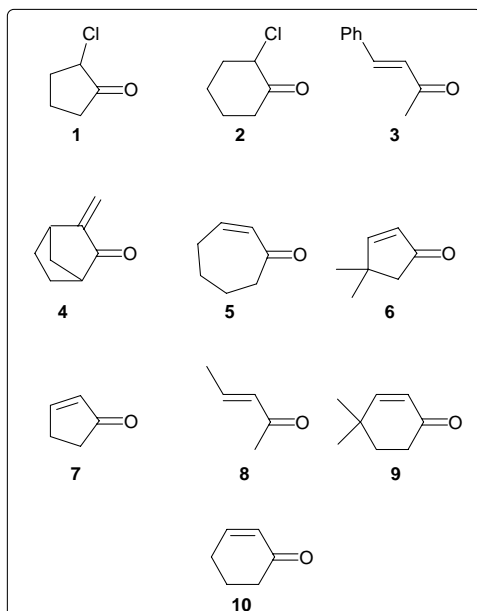

X substituent

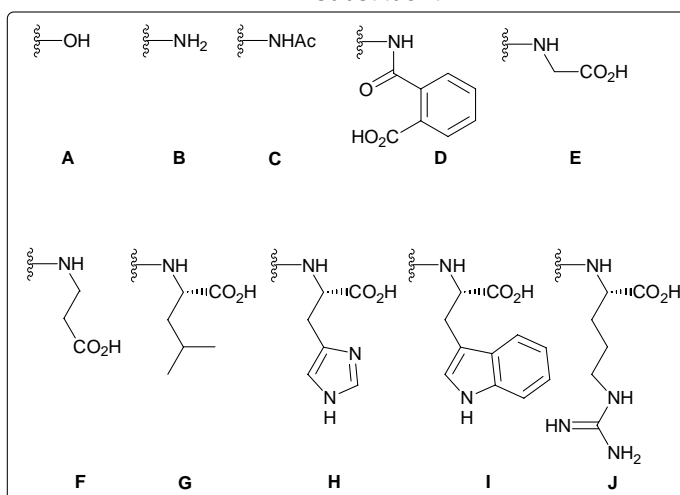

For A entries the ketone intermediate was reduced.

For C and D entries, the ketone intermediate was reductively aminated with ammonia and subsequently *N*-acylated.
